# Supplementary material
Source: PubMed Central journal article supplement (PMC4561601)
Supplement: NIHMS702709-supplement-Supplemental_data.pdf [file NIHMS702709-supplement-Supplemental_data.pdf]

## **Supplemental Information**

### **Imaging Chronic Tuberculous Lesions using Sodium [<sup>18</sup>F]Fluoride Positron Emission Tomography in Mice**

**Journal: Molecular Imaging and Biology**

Alvaro A. Ordonez<sup>1,2,3</sup>, Vincent P. DeMarco<sup>1,2,3</sup>, Mariah H. Klunk<sup>1,2,3</sup>, Supriya  
Pokkali<sup>1,2,3</sup>, Sanjay K. Jain<sup>1,2,3</sup>

<sup>1</sup>Center for Infection and Inflammation Imaging Research, <sup>2</sup>Center for Tuberculosis  
Research, <sup>3</sup>Department of Pediatrics, Johns Hopkins University, Baltimore, MD, USA.

Corresponding author: Sanjay K. Jain, M.D.  
1550 Orleans Street, CRB-II, Rm 1.09  
Baltimore, MD 21287  
Tel: 410-502-8241  
Fax: 410-614-8173  
Email: sjain5@jhmi.edu

**Supplementary Movies 1-3.** Co-registered Na<sup>[18F]</sup>F PET (color) and CT (grey) images of chronically-infected, acutely-infected and uninfected mice, rotating along the z-axis, are shown in movies 1-3 respectively. Discrete areas of Na<sup>[18F]</sup>F PET signals are noted in the lungs of the chronically-infected mouse. Na<sup>[18F]</sup>F PET signal is also noted in the bones and the urinary bladder.
